# Supplementary material for: Association of gene expression with biomass content and composition in sugarcane
Source: PLoS One. 2017 Aug 17;12(8):e0183417. doi: 10.1371/journal.pone.0183417 (PMC5560616; doi:10.1371/journal.pone.0183417)
Supplement: S3 Table — (XLSX) [file pone.0183417.s006.xlsx]

## Sheet: Sheet1
		S3 Table. List of identified transcripts that involved in the accumulation fiber and sugar between the top and bottom tissues of sugarcane plant
		Function classification	TSA accession	Length (bp)	Description	All top vs all bottom (1)		LOW fiber (2)		HIGH fiber (3)
						log2FC	padj	log2FC	padj	log2FC	padj
		Carbohydrate metabolism
		CHO metabolism	GFHJ01055927.1	1260	Putative galacturonosyltransferase activity (LGT8)	2.048	0.00407	-	-	-	-
		CHO metabolism	GFHJ01048753.1	1278	NAD(P)-linked oxidoreductase superfamily protein	1.779	0.0484	-	-	-	-
		CHO metabolism	GFHJ01029432.1	6620	Callose synthase; glucan synthase-like 12 (GSL12)	1.71	0.0484	-	-	-	-
		CHO metabolism	GFHJ01048376.1	1515	Triose phosphate/phosphate translocator	1.629	0.0361	-	-	-	-
		CHO metabolism	GFHJ01024739.1	1302	Galactose mutarotase-like superfamily protein	1.582	0.00168	-	-	-	-
		CHO metabolism	GFHJ01040676.1	3127	Similar to galactokinase.; arabinose kinase (ARA1)	1.261	0.000338	1.604	0.0102	-	-
		CHO metabolism	GFHJ01019115.1	1701	ADP-glucose pyrophosphorylase family protein	1.14	0.00371	-	-	-	-
		CHO metabolism	GFHJ01083834.1	1457	Galactinol synthase 1 (GolS1)	-1.771	0.0446	-	-	-	-
		CHO metabolism	GFHJ01072173.1	1471	GroES-like zinc-binding alcohol dehydrogenase family pro	-3.591	1.79e-07	-3.881	8.64e-05	-	-
		Photosynthesis
		Photosynthesis	GFHJ01010620.1	5346	Ribulose bisphosphate carboxylase large chain (EC 4.1.1.39)	1.716	0.00269	-	-	-	-
		Photosynthesis	GFHJ01085380.1	5200	Hypothetical 14 kDa protein ycf68 (ORF 134)	-2.13	0.0121	-	-	-	-
		Photosynthesis	GFHJ01082210.1	4706	Encodes a cysteine-rich receptor-like protein kinase	1.15	0.000422	-	-	-	-
		Photosynthesis	GFHJ01036461.1	3293	Glycine decarboxylase P-protein 2 (GLDP2)	1.178	0.0169	-	-	-	-
		Photosynthesis	GFHJ01036466.1	2380	Glycine decarboxylase P-protein 1 (GLDP1)	1.217	3.22e-05	1.361	0.00472	-	-
		Photosynthesis	GFHJ01036465.1	2122	Glycine decarboxylase P-protein 1 (GLDP1)	1.3	0.00455	-	-	-	-
		Photosynthesis	GFHJ01008632.1	1670	Hydroxypyruvate reductase	2.033	0.0246	-	-	-	-
		Photosynthesis	GFHJ01058946.1	1575	Ferredoxin--NADP reductase (EC 1.18.1.2)	1.466	0.0355	-	-	-	-
		Photosynthesis	GFHJ01042666.1	1398	Protein kinase superfamily protein	1.886	0.00187	-	-	-	-
		Photosynthesis	GFHJ01023760.1	1355	Light harvesting complex photosystem II (LHCB4.1)	1.493	0.0395	-	-	-	-
		Photosynthesis	GFHJ01058499.1	1263	Photosystem I light harvesting complex gene 2 (LHCA2)	1.524	0.0166	-	-	-	-
		Photosynthesis	GFHJ01082406.1	1227	Phosphoglycerate kinase, cytosolic (EC 2.7.2.3)	1.956	0.0184	-	-	-	-
		Photosynthesis	GFHJ01006246.1	1125	Serine hydroxymethyltransferase 4 (SHM4	1.303	0.0377	-	-	-	-
		Photosynthesis	GFHJ01067477.1	1108	Ferredoxin-related	2.034	0.0242	-	-	-	-
		Photosynthesis	GFHJ01058180.1	1094	Chlorophyll a-b binding protein 40, (LHCP)	2.811	0.000211	4.06	5.97e-06	-	-
		Photosynthesis	GFHJ01084725.1	1070	Glyceraldehyde-3-phosphate dehydrogenase A (EC 1.2.1.13)	-2.123	0.0067	-	-	-	-
		Photosynthesis	GFHJ01051698.1	1033	Chlorophyll a-b binding protein M9 (LHCP)	1.189	0.0193	-	-	-	-
		Photosynthesis	GFHJ01081837.1	948	Glycine cleavage system H protein, mitochondrial precursor	2.154	0.00383	-	-	-	-
		Photosynthesis	GFHJ01065579.1	905	Photosystem I reaction center subunit II, (PSI-D)	1.052	0.0202	-	-	-	-
		Photosynthesis	GFHJ01069199.1	881	Cytochrome b6-f complex iron-sulfur subunit (EC 1.10.99.1)	1.259	0.0124	-	-	-	-
		Photosynthesis	GFHJ01092468.1	879	Chlorophyll a-b binding protein, (LHCP)	1.581	0.0491	-	-	-	-
		Photosynthesis	GFHJ01076434.1	760	Encodes subunit O of photosystem I (PSAO)	1.221	0.0349	-	-	-	-
		Photosynthesis	GFHJ01071027.1	732	Photosystem I reaction center subunit III, (PSI-F)	2.054	0.0219	3.269	0.00177	-	-
		Photosynthesis	GFHJ01089466.1	679	Aminomethyltransferase (EC 2.1.2.10)	1.454	0.00634	1.745	0.0456	-	-
		Photosynthesis	GFHJ01086077.1	647	Photosystem I reaction center subunit psaK	1.829	0.00211	-	-	-	-
		Cell wall metabolism
		Cell wall proteins.AGPs	GFHJ01067551.1	2717	FASCICLIN-like arabinogalactan pro. 16 precursor (FLA16)	1.713	0.000384	-	-	-	-
		Cell wall proteins.AGPs	GFHJ01075959.1	1113	FASCICLIN-like arabinogalactan-pro. 11 (FLA11)	2.157	0.00441	-	-	-	-
		Cell wall proteins.AGPs	GFHJ01077204.1	1426	FASCICLIN-like arabinogalactan pro. 13 precursor (FLA13)	1.742	0.0179	-	-	-	-
		Cell wall proteins.AGPs	GFHJ01079160.1	1125	FASCICLIN-like arabinogalactan-pro. 11 (FLA11)	2.877	3.91e-05	2.742	0.0102	-	-
		Cell wall proteins.AGPs	GFHJ01072407.1	1070	FASCICLIN-like arabinogalactan-pro. 11 (FLA11)	2.049	0.0161	-	-	-	-
		Cell wall proteins.AGPs	GFHJ01092866.1	621	FASCICLIN-like arabinogalactan pro. 16 precursor (FLA16)	1.771	0.0269	-	-	-	-
		Cell wall proteins.LRR	GFHJ01087039.1	915	Leucine-rich repeat (LRR) family pro.	1.784	0.0119	-	-	-	-
		Cell wall proteins.RGP	GFHJ01014584.1	1407	Alpha-1,4-glucan-pro synthase [UDP-forming] 1	1.99	0.0189	-	-	-	-
		Cellulose synthesis	GFHJ01012296.1	4645	Encodes a cellulose synthase isomer, related to CESA6	1.805	0.0245	-	-	-	-
		Cellulose synthesis	GFHJ01021633.1	2956	Encodes a cellulose synthase isomer, related to CESA6	1.775	0.0338	-	-	-	-
		Cellulose synthesis	GFHJ01026109.1	1967	Cellulose synthase	2.853	9.66e-07	2.405	0.0165	3.443	5.05e-05
		Cellulose synthesis	GFHJ01006131.1	1575	Similar to cellulose synthase; CESA-like C5 (CSLC5)	1.54	0.00227	1.701	0.00456	-	-
		Cellulose synthesis	GFHJ01010961.1	1163	Endoglucanase 10 (Endo-1,4-beta glucanase 10) (OsGLU2)	1.124	0.00361	-	-	-	-
		Cellulose synthesis	GFHJ01093950.1	750	Endoglucanase 10 (Endo-1,4-beta glucanase 10) (OsGLU2)	1.085	0.0325	-	-	-	-
		Cellulose synthesis	GFHJ01011849.1	4499	Encodes a cellulose synthase isomer	1.458	0.0195	-	-	-	-
		Cellulose synthesis	GFHJ01012303.1	4011	Encodes a cellulose synthase isomer, related to CESA6	1.342	0.0481	-	-	-	-
		Cellulose synthesis	GFHJ01038636.1	3834	Encodes a cellulose synthase isomer	1.535	0.0191	-	-	-	-
		Cellulose synthesis	GFHJ01012287.1	3657	Encodes a cellulose synthase isomer	1.168	0.0255	-	-	1.819	0.000151
		Cellulose synthesis	GFHJ01021630.1	3654	Encodes a cellulose synthase isomer, related to CESA6	2.491	0.00204	-	-	-	-
		Cellulose synthesis	GFHJ01012286.1	3636	Encodes a cellulose synthase isomer	1.029	0.0133	-	-	-	-
		Cellulose synthesis	GFHJ01024173.1	3513	Encodes a xylem-specific cellulose synthase	2.331	0.00281	-	-	-	-
		Cellulose synthesis	GFHJ01024174.1	3413	Encodes a xylem-specific cellulose synthase	2.16	0.00766	-	-	-	-
		Cellulose synthesis	GFHJ01020613.1	3116	Encodes a cellulose synthase	2.167	0.00164	-	-	3.123	0.000263
		Cellulose synthesis	GFHJ01007596.1	3115	Encodes a member of the cellulose synthase family	2.439	0.000191	-	-	-	-
		Cellulose synthesis	GFHJ01054855.1	1673	Similar to cellulose synthase; CESA-like B4 (CSLB04)	2.445	0.000493	-	-	-	-
		Cellulose synthesis	GFHJ01021636.1	1613	Encodes a cellulose synthase isomer, related to CESA6	2.249	0.00584	-	-	-	-
		Cellulose synthesis	GFHJ01011361.1	1521	Encodes a member of the cellulose synthase family	2.703	8.89e-05	2.423	0.0309	-	-
		Cellulose synthesis	GFHJ01039058.1	1476	Encodes a gene similar to cellulose synthase	1.057	0.0206	-	-	-	-
		Cellulose synthesis	GFHJ01020611.1	1452	Encodes a cellulose synthase	2.385	0.000627	2.666	0.00357	-	-
		Cellulose synthesis	GFHJ01020612.1	1060	Encodes a cellulose synthase	2.343	0.004	2.743	0.013	-	-
		Cellulose synthesis	GFHJ01089169.1	583	Encodes a xylem-specific cellulose synthase	2.014	0.0207	2.605	0.0363	-	-
		Cellulose synthesis	GFHJ01012300.1	4025	Cellulose synthase isomer, related to CESA6	1.409	0.0224	-	-	-	-
		Cellulose synthesis	GFHJ01085160.1	678	Endoglucanase 16 precursor (Endo-1,4-beta glucanase 16)	2.219	0.00101	-	-	-	-
		Cellulose synthesis.COBRA	GFHJ01087918.1	3175	COBRA-like 3 pro precursor (Pro BRITTLE CULM1)	1.309	0.000718	-	-	-	-
		Cellulose synthesis.COBRA	GFHJ01019872.1	1968	COBRA-like 5 pro precursor (Pro BRITTLE CULM1)	2.683	6.74e-06	2.517	0.00119	-	-
		Cellulose synthesis.COBRA	GFHJ01019869.1	1848	COBRA-like 5 pro precursor (Pro. BRITTLE CULM1)	1.718	0.0335	-	-	-	-
		Cellulose synthesis.COBRA	GFHJ01069678.1	1084	COBRA-like 5 pro precursor (Pro. BRITTLE CULM1)	2.127	0.0154	-	-	-	-
		Hemicellulose synthesis	GFHJ01027881.1	4684	Plant glycogenin-like starch initiation pro. 1 (PGSIP1)	1.72	0.00912	-	-	3.731	1.9e-05
		Hemicellulose synthesis	GFHJ01006626.1	2367	Plant glycogenin-like starch initiation pro. 1 (PGSIP1)	1.085	0.00274	-	-	-	-
		Hemicellulose synthesis	GFHJ01067340.1	1891	Encodes a member of the GT43 family glycosyltransferases i	2.015	0.00928	-	-	-	-
		Hemicellulose synthesis	GFHJ01068715.1	1024	The IRX14 gene/ a putative family 43 glycosyl transferase	1.75	0.0185	-	-	-	-
		Hemicellulose synthesis	GFHJ01091851.1	717	The IRX9 gene/ a putative family 43 glycosyl transferase	2.228	9.65e-08	2.172	0.0029	2.218	0.000152
		Hemicellulose synthesis	GFHJ01068707.1	704	The IRX14 gene/ a putative family 43 glycosyl transferase	1.134	0.0327	-	-	-	-
		Cell wall modification	GFHJ01063999.1	1280	Expansin-A2 precursor (OsEXPA2) (Alpha-expansin-2)	2.833	0.00015	3.207	0.00267	-	-
		Cell wall modification	GFHJ01018646.1	1198	Expansin-B3 precursor (OsEXPB3) (Beta-expansin-3)	1.898	0.0464	-	-	-	-
		Cell wall modification	GFHJ01051006.1	1128	Expansin-B3 precursor (OsEXPB3) (Beta-expansin-3)	2.106	0.016	-	-	-	-
		Cell wall precursor	GFHJ01048016.1	5939	KDOP synthase	1.216	0.000752	-	-	-	-
		Cell wall precursor	GFHJ01010122.1	2020	UDP-glucose 6-dehydrogenase	1.714	0.0347	-	-	-	-
		Cell wall precursor	GFHJ01010131.1	2889	UDP-glucose/GDP-mannose dehydrogenase	1.38	0.0426	1.437	0.0326	-	-
		Cell wall precursor	GFHJ01010125.1	1927	UDP-glucose 6-dehydrogenase	1.949	0.0166	-	-	-	-
		Cell wall precursor	GFHJ01010126.1	1955	UDP-glucose 6-dehydrogenase	1.684	0.0261	-	-	-	-
		Cell wall precursor	GFHJ01012922.1	1423	UDP-XYL synthase 6 (UXS6)	1.264	0.0336	-	-	-	-
		Lignin pathway
		Lignin biosynthesis	GFHJ01029266.1	4379	4-coumarate--CoA ligase 2 (4CL 2)	2.182	3.08e-07	2.398	0.00078	-	-
		Lignin biosynthesis	GFHJ01029270.1	2081	4-coumarate--CoA ligase 2 (4CL 2)	2.531	0.000306	-	-	-	-
		Lignin biosynthesis	GFHJ01029267.1	1377	4-coumarate--CoA ligase 1 (4CL 1)	1.845	0.0113	2.959	0.00289	-	-
		Lignin biosynthesis	GFHJ01072682.1	994	4-coumarate--CoA ligase 2 (4CL 2)	2.413	0.0025	-	-	-	-
		Lignin biosynthesis	GFHJ01097957.1	919	4-coumarate--CoA ligase 1 (4CL 1)	1.868	0.0294	3.634	1.12e-05	-	-
		Lignin biosynthesis	GFHJ01093737.1	797	4-coumarate--CoA ligase 1 (4CL 1)	2.086	0.00783	2.396	0.0453	-	-
		Lignin biosynthesis	GFHJ01097535.1	511	4-coumarate--CoA ligase 1 (4CL 1)	2.432	1.58e-09	2.631	2.45e-05	2.271	7.37e-05
		Lignin biosynthesis	GFHJ01038328.1	1736	Encodes coumarate 3-hydroxylase (C3H)	1.418	0.0135	-	-	-	-
		Lignin biosynthesis	GFHJ01038327.1	1471	Encodes coumarate 3-hydroxylase (C3H)	-2.494	0.00202	-	-	-	-
		Lignin biosynthesis	GFHJ01038324.1	1089	Encodes coumarate 3-hydroxylase (C3H)	1.542	0.0315	-	-	-	-
		Lignin biosynthesis	GFHJ01040835.1	1588	Cinnamyl alcohol dehydrogenase (CAD)	1.547	0.0067	1.926	2.86e-05	-	-
		Lignin biosynthesis	GFHJ01023919.1	1361	NAD-dependent mannitol dehydrogenase	2.175	0.00504	-	-	-	-
		Lignin biosynthesis	GFHJ01023918.1	1325	NAD-dependent mannitol dehydrogenase	2.066	0.00216	-	-	-	-
		Lignin biosynthesis	GFHJ01061997.1	925	Cinnamyl alcohol dehydrogenase (CAD)	1.667	0.0138	-	-	-	-
		Lignin biosynthesis	GFHJ01054272.1	1205	Caffeoyl-CoA O-methyltransferase 5 CCoAOMT 5	3.047	4.49e-06	2.997	0.00279	-	-
		Lignin biosynthesis	GFHJ01053845.1	1181	Caffeoyl-CoA O-methyltransferase 5 CCoAOMT 5	2.003	0.0059	-	-	-	-
		Lignin biosynthesis	GFHJ01053752.1	1179	Caffeoyl-CoA O-methyltransferase 5 CCoAOMT 5	2.511	1.54e-05	2.638	0.000566	-	-
		Lignin biosynthesis	GFHJ01052852.1	1116	Caffeoyl-CoA O-methyltransferase 1 CCoAOMT 1	2.031	7.85e-05	-	-	-	-
		Lignin biosynthesis	GFHJ01052728.1	1079	Caffeoyl-CoA O-methyltransferase 1 CCoAOMT 1	2.819	8.43e-05	-	-	4.551	4.97e-06
		Lignin biosynthesis	GFHJ01052865.1	1041	Caffeoyl-CoA O-methyltransferase 1 CCoAOMT 1	2.042	0.000458	-	-	-	-
		Lignin biosynthesis	GFHJ01079408.1	1036	Caffeoyl-CoA O-methyltransferase CCoAOMT	2.769	0.000154	2.742	0.0215	-	-
		Lignin biosynthesis	GFHJ01052358.1	863	Caffeoyl-CoA O-methyltransferase 1 CCoAOMT 1	1.592	0.0288	2.694	0.00117	-	-
		Lignin biosynthesis	GFHJ01063488.1	835	Caffeoyl-CoA O-methyltransferase 1 CCoAOMT 1	2.362	0.00415	-	-	-	-
		Lignin biosynthesis	GFHJ01099485.1	517	Caffeoyl-CoA O-methyltransferase 1 CCoAOMT 1	1.784	0.0015	2.4	0.00416	-	-
		Lignin biosynthesis	GFHJ01077303.1	4475	Encodes a cinnamoyl CoA reductase CCR	1.576	1.73e-07	1.725	7.16e-06	-	-
		Lignin biosynthesis	GFHJ01046614.1	3322	Encodes a cinnamoyl CoA reductase CCR	3.448	9.69e-11	3.264	5.24e-05	3.703	2.65e-05
		Lignin biosynthesis	GFHJ01050680.1	1656	Encodes a cinnamoyl CoA reductase CCR	2.888	2.72e-05	3.138	0.0003	-	-
		Lignin biosynthesis	GFHJ01046618.1	1597	Encodes a cinnamoyl CoA reductase CCR	2.593	2.88e-05	2.808	0.00379	-	-
		Lignin biosynthesis	GFHJ01049842.1	1593	Encodes a cinnamoyl CoA reductase CCR	2.927	3.38e-07	3.239	5.39e-07	-	-
		Lignin biosynthesis	GFHJ01046616.1	1558	Encodes a cinnamoyl CoA reductase CCR	2.171	0.00546	-	-	-	-
		Lignin biosynthesis	GFHJ01046617.1	1522	Encodes a cinnamoyl CoA reductase CCR	2.099	0.00886	-	-	-	-
		Lignin biosynthesis	GFHJ01052154.1	1471	Encodes a cinnamoyl CoA reductase CCR	2.687	0.000418	3.165	0.00373	-	-
		Lignin biosynthesis	GFHJ01022829.1	1451	Encodes a cinnamoyl CoA reductase CCR	2.607	0.000113	2.797	0.00353	-	-
		Lignin biosynthesis	GFHJ01091564.1	1347	Encodes a cinnamoyl CoA reductase CCR	3.587	2.43e-10	4.337	3.61e-09	-	-
		Lignin biosynthesis	GFHJ01046615.1	1223	Encodes a cinnamoyl CoA reductase CCR	2.375	0.00319	-	-	-	-
		Lignin biosynthesis	GFHJ01078876.1	1075	Encodes a cinnamoyl CoA reductase (CCR) isoform	3.108	1.76e-07	2.581	0.0308	4.149	6.56e-07
		Lignin biosynthesis	GFHJ01065671.1	1222	Caffeic acid 3-O-methyl transferase (COMT)	2.088	0.00092	-	-	-	-
		Lignin biosynthesis	GFHJ01064057.1	1172	Caffeic acid 3-O-methyl transferase (COMT)	1.81	0.0287	-	-	-	-
		Lignin biosynthesis	GFHJ01087651.1	634	Caffeic acid 3-O-methyl transferase (COMT)	1.705	0.0205	-	-	-	-
		Lignin biosynthesis	GFHJ01063430.1	1024	Encodes ferulate 5-hydroxylase (F5H)	1.715	0.000611	1.702	0.0298	-	-
		Lignin biosynthesis	GFHJ01029789.1	2572	Encodes a phenylalanine ammonia-lyase 1 (PAL1)	2.443	0.000236	3.177	2.56e-11	-	-
		Lignin biosynthesis	GFHJ01006551.1	2498	Encodes a phenylalanine ammonia-lyase 1 (PAL1)	2.284	0.00638	-	-	-	-
		Lignin biosynthesis	GFHJ01029788.1	2253	Encodes phenylalanine lyase (PAL)	1.966	0.00126	2.165	0.0231	-	-
		Lignin biosynthesis	GFHJ01029795.1	2124	Encodes a phenylalanine ammonia-lyase 1 (PAL1)	1.241	0.0105	-	-	-	-
		Lignin biosynthesis	GFHJ01046492.1	2092	Encodes phenylalanine lyase (PAL)	2.446	4.27e-05	2.348	0.0431	2.542	0.000213
		Lignin biosynthesis	GFHJ01006548.1	2012	Encodes a phenylalanine ammonia-lyase 1 (PAL1)	2.757	6.31e-05	-	-	3.448	6.64e-05
		Lignin biosynthesis	GFHJ01046483.1	1909	Encodes phenylalanine lyase (PAL)	1.996	0.0287	-	-	-	-
		Lignin biosynthesis	GFHJ01006550.1	1717	Encodes phenylalanine lyase (PAL)	2.351	0.00207	-	-	3.327	0.000274
		Lignin biosynthesis	GFHJ01006553.1	1558	Encodes phenylalanine lyase (PAL)	3.198	1.11e-06	2.605	0.0464	3.882	3.71e-05
		Lignin biosynthesis	GFHJ01006552.1	1450	Encodes phenylalanine lyase (PAL)	1.947	0.037	-	-	-	-
		Lignin biosynthesis	GFHJ01046493.1	1400	Encodes phenylalanine lyase (PAL)	2.432	8.45e-05	2.579	0.0102	-	-
		Lignin biosynthesis	GFHJ01046477.1	1317	Encodes phenylalanine lyase (PAL)	2.29	0.00433	-	-	-	-
		Lignin biosynthesis	GFHJ01048703.1	1136	Encodes phenylalanine lyase (PAL)	1.707	0.0322	-	-	-	-
		Lignin biosynthesis	GFHJ01049598.1	1096	Encodes phenylalanine lyase (PAL)	1.887	0.0359	-	-	-	-
		Lignin biosynthesis	GFHJ01064224.1	930	Encodes phenylalanine lyase (PAL)	1.872	0.0452	-	-	-	-
		Lignin biosynthesis	GFHJ01096829.1	913	Encodes a phenylalanine ammonia-lyase 1 (PAL1)	1.658	0.0134	-	-	-	-
		Lignin biosynthesis	GFHJ01075223.1	838	Encodes phenylalanine lyase (PAL)	3.186	8.91e-15	3.088	1.45e-05	3.244	2.3e-08
		Lignin biosynthesis	GFHJ01082545.1	674	Encodes phenylalanine lyase (PAL)	3.135	1.79e-07	2.469	0.0231	4.53	5.91e-07
		Dirigent proteins
		Dirigent protein	GFHJ01085375.1	1084	Dirigent protein	2.135	0.00797	-	-	-	-
		Dirigent protein	GFHJ01067768.1	1057	Dirigent protein	2.25	0.00191	2.347	0.0381	-	-
		Dirigent protein	GFHJ01072645.1	1037	Dirigent protein	1.903	0.0279	-	-	-	-
		Dirigent protein	GFHJ01081787.1	871	Dirigent protein	2.676	0.000366	2.896	0.0079	-	-
		Dirigent protein	GFHJ01073901.1	731	Dirigent protein	1.923	0.0215	-	-	-	-
		Dirigent protein	GFHJ01090373.1	712	Dirigent protein	2.171	0.0058	2.809	0.00243	-	-
		Dirigent protein	GFHJ01077001.1	674	Dirigent protein	1.914	0.00352	2.212	0.0275	-	-
		Positive log2FC values indicates that up-regulated in the top (immature) tissues, while negative log2FC values indicate down-regulated in the top (immature) tissues. Pro: protein, padj: adjusted p-value. (1) All top internodal samples compared against all bottom internodal samples. (2) top internodal versa bottom internodal samples of low fiber genotypes. (3) top internodal versa bottom internoda…
